# Supplementary material for: Immune System Stimulation Reduces the Efficiency of Whole-Body Protein Deposition and Alters Muscle Fiber Characteristics in Growing Pigs
Source: MDPI journal article supplement (doi:10.3390/ani9060323), 2019-06-06
Supplement: s1 [file s1]

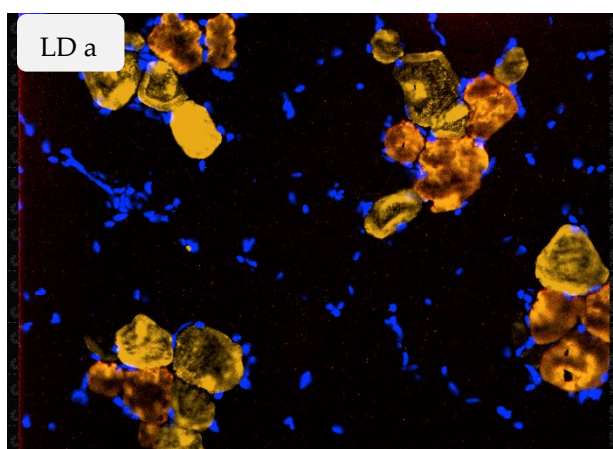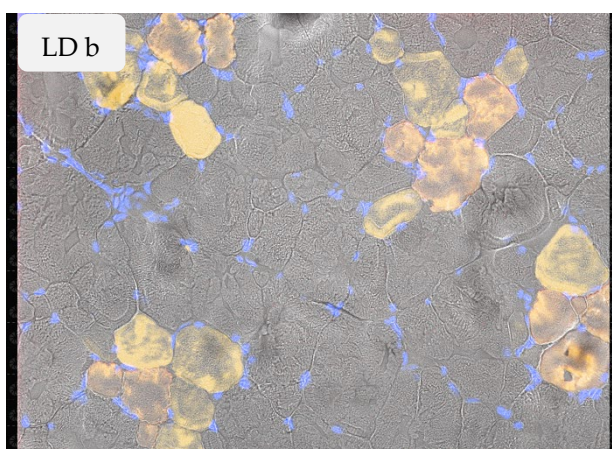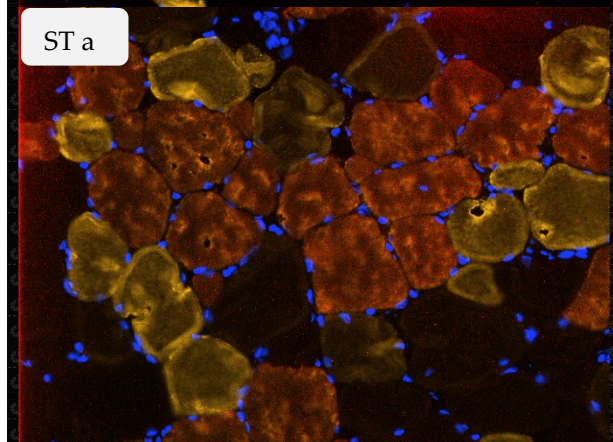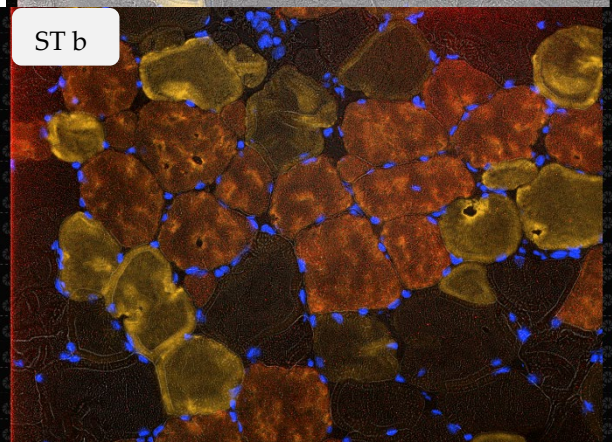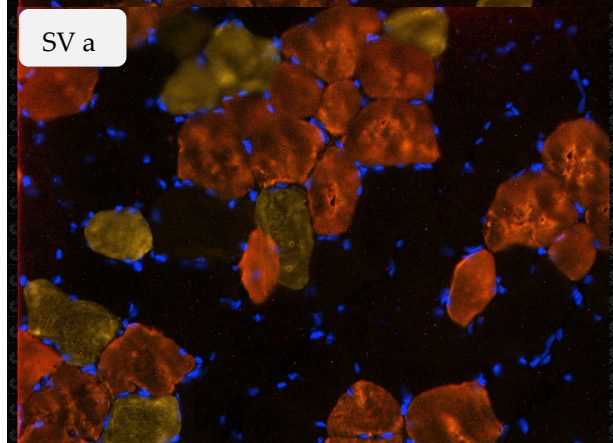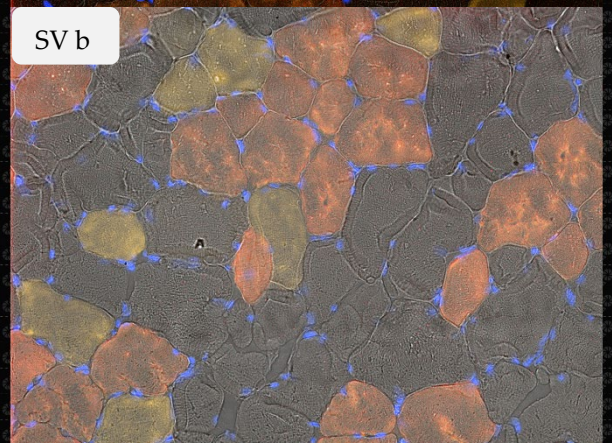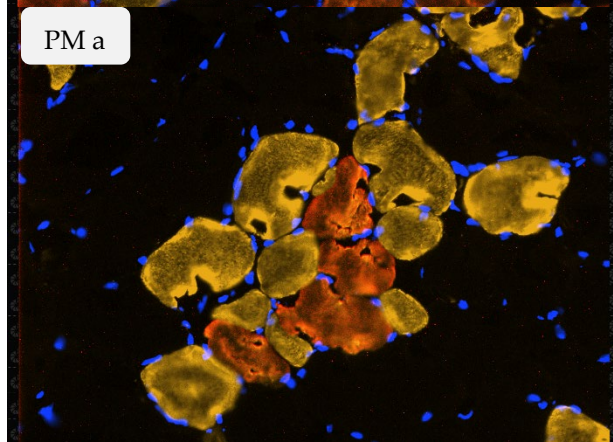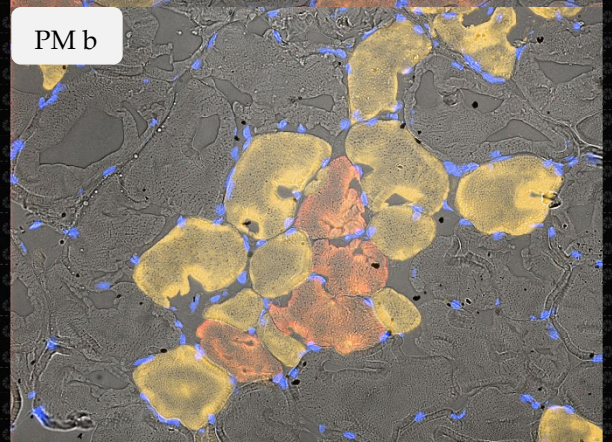

**Figure S1.** Example images of sections of *longissimus dorsi* (LD), *semitendinosus* (ST), *serratus ventralis* (SV) and *psoas major* (PM) with (a) or without (b) transil-lumination. Immunohistochemical staining of cross sections was performed using anti-myosin heavy chain (MHC)-IIB IgM (10F5), anti-MHC-IIA and anti-MHC-I IgG1 (BF-35), and anti-MHC-I IgG2b (BA-D5). Slides were imaged using an inverted fluorescence microscope with a UV light source and a CoolSnap ES2 monochrome camera. Images were artificially colored and analyzed using NIS Elements Imaging software.
